# Supplementary material for: Seasonal migrations, body temperature fluctuations, and infection dynamics in adult amphibians
Source: PeerJ. 2018 May 8;6:e4698. doi: 10.7717/peerj.4698 (PMC5947160; doi:10.7717/peerj.4698)
Supplement: Data S1 — For radiotracking each data point indicates a capture event. For infection data each data point indicates Bd load (zoospore equivalents) recorded for a specific year. For internal temperature data each data point indicates daily averaged internal temperature of every of the three studied toad. [file peerj-06-4698-s001.xlsx]

## Sheet: radiotracking
Trans. ID	Date	Time	UTM Zone	Easting	Northing
141341	2009-05-28	22:30:00	30	419311	4521471
141341	2009-06-14	20:55:00	30	419398	4521646
141341	2009-06-16	13:15:00	30	419401	4521681
141341	2009-06-21	10:44:00	30	419402	4521704
141341	2009-06-30	19:20:00	30	419415	4521770
141341	2009-07-04	17:45:00	30	419405	4521702
141341	2009-07-06	18:40:00	30	419403	4521708
141341	2009-07-08	18:15:00	30	419406	4521704
141341	2009-07-12	17:18:00	30	419403	4521702
141341	2009-07-22	13:12:00	30	419409	4521707
141341	2009-07-27	13:06:00	30	419407	4520912
141341	2009-07-29	15:15:00	30	419405	4521696
141341	2009-08-02	19:37:00	30	419403	4521701
141342	2009-05-31	11:00:00	30	420112	4523708
141342	2009-06-18	14:45:00	30	420447	4523794
141342	2009-06-21	13:15:00	30	420445	4523781
141343	2009-05-28	22:30:00	30	419311	4521471
141343	2009-06-02	14:00:00	30	419309	4521461
141343	2009-08-09	18:00:00	30	419428	4521678
141343	2009-08-11	17:39:00	30	419475	4521706
141343	2009-08-19	20:07:00	30	419403	4521698
141343	2009-08-23	17:15:00	30	419404	4521710
141343	2009-08-27	20:45:00	30	419409	4521697
141343	2009-08-30	13:39:00	30	419415	4521700
141343	2009-09-01	13:22:00	30	419406	4521698
141343	2009-09-06	13:40:00	30	419417	4521697
141343	2009-09-14	18:15:00	30	419409	4521692
141343	2009-09-17	12:00:00	30	419415	4521691
141343	2009-07-13	22:50:00	30	419204	4521538
141343	2009-07-15	13:03:00	30	419207	4521538
141343	2009-07-23	13:50:00	30	419202	4521530
141343	2009-07-27	14:38:00	30	419200	4521535
141343	2009-08-02	21:30:00	30	419207	4521529
141344	2009-05-28	22:30:00	30	419311	4521471
141344	2009-06-16	11:35:00	30	419173	4521604
141344	2009-06-22	11:27:00	30	419172	4521598
141344	2009-06-30		30	419202	4521661
141344	2009-07-04	18:21:00	30	419182	4521598
141344	2009-07-06	19:16:00	30	419185	4521602
141344	2009-07-08	19:17:00	30	419183	4521601
141344	2009-07-12	18:07:00	30	419183	4521601
141344	2009-07-27	13:45:00	30	419198	4521620
141344	2009-07-29		30	419198	4521620
141344	2009-08-02	20:30:00	30	419193	4521619
141345	2009-07-28	11:30:00	30	419737	4520868
141345	2009-07-29	12:35:00	30	419764	4520881
141345	2009-08-02	14:20:00	30	419739	4520878
141345	2009-08-04	13:15:00	30	419743	4520882
141345	2009-08-09	17:00:00	30	419743	4520882
141345	2009-08-19	18:59:00	30	419767	4520881
141345	2009-08-23	20:45:00	30	419767	4520881
141345	2009-08-30	12:43:00	30	419772	4520904
141345	2009-09-01		30	419772	4520904
141345	2009-09-07	17:30:00	30	419766	4520884
141345	2009-09-22	11:41:00	30	419803	4520890
141345	2009-05-30		30	419728	4520868
141345	2009-06-02	14:45:00	30	419732	4520869
141345	2009-06-09		30	419732	4520869
141345	2009-06-11	23:30:00	30	419660	4520851
141345	2009-06-18	10:45:00	30	419684	4520868
141345	2009-06-30	16:30:00	30	419752	4520933
141345	2009-07-04	19:51:00	30	419741	4520868
141345	2009-07-20	13:00:00	30	419743	4520863
141345	2009-07-27	12:15:00	30	419737	4520867
141346	2009-07-26	14:30:00	30	420378	4522998
141346	2009-07-28		30	420378	4522998
141346	2009-08-03	16:45:00	30	420375	4523003
141346	2009-08-08	19:15:00	30	420375	4523003
141346	2009-08-11	10:34:00	30	420385	4523005
141346	2009-08-20	13:00:00	30	420387	4523000
141346	2009-08-22	16:30:00	30	420387	4523000
141346	2009-08-23	18:40:00	30	420384	4523000
141346	2009-08-27	17:30:00	30	420384	4523000
141347	2009-06-02	21:00:00	30	419733	4520869
141347	2009-06-09	14:00:00	30	419796	4520803
141347	2009-06-17	12:30:00	30	419747	4520598
141347	2009-06-18	09:15:00	30	419747	4520598
141347	2009-06-21	21:27:00	30	419738	4520595
141347	2009-06-30	14:30:00	30	419753	4520677
141347	2009-07-04	20:45:00	30	419756	4520579
141347	2009-07-06	16:31:00	30	419736	4520471
141347	2009-07-13	12:53:00	30	419766	4520436
141347	2009-07-20	14:40:00	30	419770	4520436
141347	2009-07-27	11:10:00	30	419779	4520424
141347	2009-07-29	11:08:00	30	419766	4520430
141347	2009-08-02	12:53:00	30	419766	4520436
141347	2009-08-04	11:20:00	30	419763	4520436
141347	2009-08-09	15:51:00	30	419761	4520438
141347	2009-08-13	12:22:00	30	419755	4520403
141347	2009-08-19	15:27:00	30	419744	4520404
141347	2009-08-23	14:40:00	30	419745	4520399
141347	2009-08-26	13:00:00	30	419765	4520411
141347	2009-08-30	11:30:00	30	419768	4520429
141347	2009-09-01	11:33:00	30	419774	4520413
141347	2009-09-07	16:34:00	30	419746	4520401
141348	2009-05-31	11:00:00	30	420112	4523708
141348	2009-06-06	21:00:00	30	420080	4523741
141348	2009-06-10	17:50:00	30	420066	4523727
141348	2009-06-16	19:45:00	30	420037	4523750
141348	2009-06-21	12:30:00	30	420064	4523729
141348	2009-07-05	13:11:00	30	420064	4523732
141348	2009-07-07	11:20:00	30	420066	4523729
141348	2009-07-12	13:30:00	30	420066	4523730
141348	2009-07-15	11:12:00	30	420192	4523751
141348	2009-07-27	11:30:00	30	419728	4520868
141348	2009-07-29	12:21:00	30	419739	4520860
141348	2009-08-02	13:40:00	30	419733	4520852
141348	2009-08-04	12:45:00	30	419738	4520856
141348	2009-08-09	17:10:00	30	419731	4520891
141348	2009-08-19	18:30:00	30	419767	4520866
141348	2009-08-23	20:30:00	30	419767	4520866
141349	2009-05-31		30	419232	4521440
141349	2009-06-16	12:50:00	30	419264	4521527
141349	2009-06-22	10:19:00	30	419264	4521523
141349	2009-06-30	21:18:00	30	419276	4521609
141349	2009-07-04	18:54:00	30	419243	4521554
141349	2009-07-08		30	419251	4521552
141349	2009-07-12	18:30:00	30	419242	4521563
141349	2009-07-13	10:25:00	30	419245	4521555
141349	2009-07-23	15:30:00	30	419250	4521543
141349	2009-07-27	15:00:00	30	419250	4521543
141349	2009-07-29	13:45:00	30	419244	4521553
141349	2009-08-02	21:53:00	30	419246	4521557
141349	2009-08-08	17:05:00	30	419243	4521565
141350	2009-06-01		30	420216	4523116
141350	2009-06-10	15:35:00	30	420253	4523104
141350	2009-06-16	17:00:00	30	420254	4523102
141350	2009-06-21	14:15:00	30	420252	4523103
141350	2009-07-05	14:35:00	30	420255	4523103
141350	2009-07-09	14:19:00	30	420255	4523103
141350	2009-07-12	14:17:00	30	420254	4523104
141350	2009-07-15	11:35:00	30	420251	4523101
141350	2009-07-23	11:45:00	30	420191	4523109
141350	2009-07-26	13:30:00	30	420184	4523121
141350	2009-07-28	15:15:00	30	420184	4523121
141350	2009-08-03	15:15:00	30	420181	4523124
141350	2009-08-08	18:45:00	30	420172	4523112
141350	2009-08-09	12:15:00	30	420148	4523147
141351	2009-06-07		30	420220	4523099
141351	2009-06-10	15:00:00	30	420224	4523071
141351	2009-06-16	17:30:00	30	420230	4522959
141351	2009-06-21	15:00:00	30	420230	4522961
141351	2009-07-05	14:51:00	30	420233	4522960
141351	2009-07-09	13:40:00	30	420259	4522978
141351	2009-07-12	15:09:00	30	420258	4522973
141351	2009-07-26	14:00:00	30	420258	4522973
141351	2009-07-28		30	420258	4522973
141351	2009-08-08	19:01:00	30	420254	4522974
141351	2009-08-11	17:07:00	30	420213	4522959
141351	2009-08-20	12:50:00	30	420359	4522974
141351	2009-08-22	18:42:00	30	420262	4522971
141351	2009-08-23	18:15:00	30	420262	4522971
141351	2009-08-27	20:00:00	30	420262	4522971
141351	2009-08-31		30	420262	4522971
141351	2009-09-16	11:26:00	30	420266	4522971
141352	2009-06-03			419736	4520865
141352	2009-06-09	15:30:00	30	419907	4520897
141352	2009-06-18	19:30:00	30	419966	4520897
141352	2009-06-21	22:11:00	30	419932	4520869
141352	2009-06-30	15:20:00	30	420046	4520969
141352	2009-07-04	20:18:00	30	420034	4520909
141352	2009-07-06	17:21:00	30	420030	4520909
141352	2009-07-13	13:18:00	30	420031	4520912
141352	2009-07-20	13:45:00	30	420029	4520896
141352	2009-07-27	11:45:00	30	420030	4520912
141352	2009-07-29	11:48:00	30	420030	4520899
141352	2009-08-02	18:00:00	30	420030	4520908
141352	2009-08-04	12:00:00	30	420029	4520906
141352	2009-08-09	16:21:00	30	420114	4520984
141352	2009-08-13	13:00:00	30	420114	4520984
141352	2009-08-19	17:50:00	30	420106	4520979
141352	2009-08-23	15:08:00	30	420110	4520980
141352	2009-08-25	13:15:00	30	420021	4523582
141352	2009-08-26	13:51:00	30	420113	4520976
141352	2009-08-30	11:58:00	30	420113	4520974
141352	2009-09-01		30	420110	4520979
141352	2009-09-07	17:00:00	30	420109	4520982
141352	2009-09-14	17:30:00	30	420109	4520982
141352	2009-09-17	11:30:00	30	420109	4520982
141353	2009-06-01		30	420216	4523116
141353	2009-06-16	18:15:00	30	420596	4523042
141353	2009-06-21	15:45:00	30	420599	4523037
141353	2009-07-05	15:30:00	30	420618	4523032
141353	2009-07-09	12:49:00	30	420597	4523041
141353	2009-07-12	15:56:00	30	420615	4523025
141353	2009-07-23	13:40:00	30	420384	4522964
141353	2009-07-26	14:30:00	30	420378	4522998
141353	2009-07-28	16:17:00	30	420384	4523006
141353	2009-08-03	16:30:00	30	420382	4523008
141353	2009-08-05	10:30:00	30	420352	4523012
141353	2009-08-08	19:34:00	30	420376	4523005
141353	2009-08-22	16:47:00	30	420387	4522983
141353	2009-08-23	19:00:00	30	420377	4523005
141353	2009-08-25	13:00:00	30	420042	4523664
141353	2009-08-27	19:37:00	30	420385	4523003
141354	2009-06-01		30	420091	4522565
141354	2009-06-10	14:17:00	30	420097	4522552
141354	2009-06-16		30	420097	4522552
141354	2009-07-05	11:11:00	30	420081	4522556
141354	2009-07-07	10:25:00	30	420097	4522549
141354	2009-07-09	15:30:00	30	420085	4522554
141354	2009-07-12	11:36:00	30	420096	4522550
141354	2009-07-15	09:30:00	30	420096	4522550
141354	2009-07-26	11:00:00	30	420119	4522547
141354	2009-07-28	13:04:00	30	420126	4522554
141354	2009-08-03	13:00:00	30	420126	4522554
141354	2009-08-08	18:00:00	30	420126	4522554
141354	2009-08-09		30	420126	4522554
141354	2009-08-11	19:44:00	30	420143	4522536
141354	2009-08-20	11:00:00	30	420126	4522554
141354	2009-08-22	19:19:00	30	420118	4522543
141354	2009-08-23	18:00:00	30	420126	4522554
141354	2009-08-27	20:30:00	30	420126	4522554
141354	2009-08-31	17:18:00	30	420128	4522538
141354	2009-09-06	13:00:00	30	420119	4522544
141354	2009-09-07	16:21:00	30	420129	4522542
141355	2009-05-31	11:00:00	30	420112	4523708
141355	2009-06-06	22:00:00	30	420055	4523641
141355	2009-06-10	18:46:00	30	420053	4523636
141355	2009-06-16	20:30:00	30	420126	4523543
141355	2009-06-18	13:30:00	30	420092	4523555
141355	2009-06-21	11:15:00	30	420092	4523555
141355	2009-07-05	11:45:00	30	420092	4523555
141355	2009-07-07	11:00:00	30	420092	4523555
141355	2009-07-12	12:30:00	30	420038	4523605
141355	2009-07-26	11:30:00	30	420038	4523605
141355	2009-07-28	13:29:00	30	420092	4523556
141355	2009-08-09	11:29:00	30	420000	4523603
141356	2009-05-31	11:00:00	30	420112	4523708
141356	2009-06-06	22:30:00	30	420062	4523617
141356	2009-06-10	14:00:00	30	420133	4523664
141356	2009-06-16	20:10:00	30	420038	4523605
141356	2009-06-21	13:45:00	30	420026	4523596
141356	2009-07-05	12:04:00	30	420018	4523588
141356	2009-07-12	12:00:00		420018	4523588
141356	2009-07-23	12:30:00	30	420028	4523602
141356	2009-07-26	12:30:00	30	420028	4523602
141356	2009-07-28	14:15:00	30	420034	4523588
141356	2009-08-03	14:00:00	30	420017	4523583
141356	2009-08-20	11:45:00	30	420019	4523581
141356	2009-08-22	18:12:00	30	420014	4523586
141356	2009-08-31	18:00:00	30	420018	4523582
141356	2009-09-06	12:00:00	30	420020	4523581
141356	2009-09-16	12:00:00	30	420024	4523583
141356	2009-09-22	13:49:00	30	420016	4523588
141357	2009-05-31	11:00:00	30	420112	4523708
141357	2009-06-10	18:15:00	30	420051	4523669
141357	2009-06-16	21:00:00	30	419918	4523656
141357	2009-06-18	14:00:00	30	419929	4523658
141357	2009-06-21	12:15:00	30	419932	4523662
141357	2009-07-05	12:32:00	30	419930	4523657
141357	2009-07-07	11:47:00	30	419936	4523661
141357	2009-07-12	12:50:00	30	419933	4523663
141357	2009-07-15	10:41:00	30	419928	4523658
141357	2009-07-26	12:00:00	30	420053	4523668
141357	2009-07-28	14:30:00	30	420035	4523687
141357	2009-08-03	14:30:00	30	420053	4523669
141357	2009-08-05	11:30:00	30	420054	4523670
141357	2009-08-09	11:47:00	30	420028	4523670
141357	2009-08-20	12:06:00	30	420055	4523664
141357	2009-08-22	17:21:00	30	420046	4523672
141357	2009-08-31	18:21:00	30	419986	4523648
141357	2009-09-06	12:30:00	30	420058	4523658
141357	2009-09-16	12:22:00	30	420050	4523670
141358	2009-05-31		30	419232	4521440
141358	2009-06-16	12:30:00	30	419158	4521513
141358	2009-06-22	11:44:00	30	419150	4521510
141358	2009-06-30	20:56:00	30	419160	4521579
141358	2009-07-04	18:33:00	30	419144	4521510
141358	2009-07-06	19:49:00	30	419139	4521516
141358	2009-07-08	19:31:00	30	419112	4521532
141358	2009-07-12		30	419112	4521530
141358	2009-07-13	23:06:00	30	419114	4521529
141358	2009-07-27	14:06:00	30	419125	4521508
141358	2009-07-29	14:34:00	30	419108	4521533
141358	2009-08-02	21:00:00	30	419105	4521523
141358	2009-08-04	14:25:00	30	419105	4521538
141358	2009-08-08	17:22:00	30	419095	4521550
141358	2009-08-11	17:00:00	30	419074	4521562
141358	2009-08-19	19:40:00	30	419078	4521552
141358	2009-08-23	16:42:00	30	419084	4521560
141358	2009-08-27	21:15:00	30	419078	4521555
141358	2009-08-30	14:01:00	30	419076	4521563
141358	2009-09-01	13:52:00	30	419074	4521563
141358	2009-09-06	14:15:00	30	419015	4521652
141359	2009-05-31		30	419232	4521440
141359	2009-06-14	21:15:00	30	419430	4521700

## Sheet: Bd load
Pit-tag	2008	2009	2010	2011	2012	2013	2014	2015
149939	0	0
154126		2.315			0
154822		0		0
160389	0	1.92833	0
162736	0	7.13333	0
174331	0	0	38.7638
178711	0	0			39.9532
180890	0	0.6925			0
183332	19.6067	0		415
187075	0	0			0
188184	0	0		0
192723	0	0.995859			0
193559	0	48.06				0
204796	0	0			1965
213220		0	0		0			800
241424	0	0			40.7445		205
243422	0		0		43.2717	0
254348	0	1760.53	0			0
261973	0	14526.5	0			0
263100	0	11.104	0		0
268125	0	0			0	0
270802		0			41	107.063	13.5187
274041		0	0		0	0
274753	0	0	0			0		220
278313	0	0	0			0	2065
284933		0	0		48.2628		30570	0
285326				1105	2055.62	0	0	740
293073	0	0			34.5183		1503.52	0
296864	0	0		0		0	1105
305748		0	0		0	0		0
306035		0			0	0	155	1050.96
308620		0	0			0	275.085	455.911
315533	0	0	0		0	94.2585
317995		0		180	90	55	200
321951	223.421	122.74	0		0	0.52708		150
356261	0	7.29333	0			0	0	70
366433	0	200.605			0	0	0	10
402790	0	183.37	0	761.434	44.4165	10	45	185

## Sheet: temperatures
Date	Pajaros	Mariposa	Chica
2014-05-24			8.9125
2014-05-25			9.91333
2014-05-26			9.61833
2014-05-27			9.74667
2014-05-28			7.99
2014-05-29			9.16167
2014-05-30			9.955
2014-05-31			10.7508
2014-06-01			12.4233
2014-06-02			12.7558
2014-06-03			13.8425
2014-06-04			14.135
2014-06-05			14.9308
2014-06-06			11.8392
2014-06-07			13.3842
2014-06-08			14.4283
2014-06-09			16.515
2014-06-10			15.5158
2014-06-11			16.35
2014-06-12	12.1192	12.6742	16.6833
2014-06-13	17.6692	15.3492	18.935
2014-06-14	15.79	16.31	19.4367
2014-06-15	13.9975	15.0158	17.2667
2014-06-16	13.9967	14.9317	16.5158
2014-06-17	12.955	14.4292	15.3892
2014-06-18	13.5392	15.225	16.6808
2014-06-19	14.9167	15.6833	18.4383
2014-06-20	13.9525	15.6417	18.0208
2014-06-21	13.4958	16.3108	15.2208
2014-06-22	13.4125	15.4342	17.1017
2014-06-23	13.8292	15.1825	17.3525
2014-06-24	10.4508	10.25	9.79
2014-06-25	10.615	12.7158	11.8792
2014-06-26	10.7842	12.09	13.5917
2014-06-27	12.5367	12.9667	13.8417
2014-06-28	14.7892	13.135	15.1383
2014-06-29	13.6633	12.8842	12.9658
2014-06-30	13.6633	14.5117	15.0975
2014-07-01	13.7033	13.4708	15.4317
2014-07-02	10.6575	11.7975	12.9658
2014-07-03	8.65167	8.66083	9.33083
2014-07-04	9.90583	10.6675	12.3375
2014-07-05	12.0342	13.4258	16.1383
2014-07-06	12.9958	12.55	15.2192
2014-07-07	10.825	13.1758	13.4667
2014-07-08	13.16	13.3425	14.635
2014-07-09	12.66	14.0117	15.6383
2014-07-10	15.9983	15.1817	15.0942
2014-07-11	17.0008	16.0175	15.7208
2014-07-12	13.4958	16.7283	16.0133
2014-07-13	17.8342	16.9775	17.5183
2014-07-14	18.7942	17.1	18.3933
2014-07-15	21.2125	19.2308	18.5608
2014-07-16	21.3375	19.2725	20.105
2014-07-17	23.2133	19.275	20.3983
2014-07-18	20.965	17.98	20.5233
2014-07-19	15.915	12.2992	16.975
2014-07-20	11.9933	8.19917	12.6325
2014-07-21	17	11.46	14.2192
2014-07-22	14.4975	12.7183	15.4317
2014-07-23	15.3742	18.3958	17.185
2014-07-24	15.6658	18.8992	18.0625
2014-07-25	21.13	17.0192	19.4808
2014-07-26	22.1283	18.3942	20.1067
2014-07-27	16.6683	18.815	20.2317
2014-07-28	16.6683	17.6833	20.2725
2014-07-29	16.9608	19.4392	18.4392
2014-07-30	18.38	18.8958	17.8542
2014-07-31	18.6317	18.7717	17.7283
2014-08-01	20.8383	13.3833	13.5083
2014-08-02	17.7533	15.6408	13.1758
2014-08-03	16.71	13.2158	13.2175
2014-08-04	18.5858	11.2117	16.5533
2014-08-05	19.63	13.76	15.3042
2014-08-06	19.17	11.63	16.055
2014-08-07	18.7975	18.0175	17.39
2014-08-08	18.2525	20.1083	17.1008
2014-08-09	16.4175	18.6042	16.47
2014-08-10	17.5433	11.755	16.8967
2014-08-11	18.7525	16.2292	14.9717
2014-08-12	19.0033	16.7308	16.0575
2014-08-13	13.0783	11.6708	13.8867
2014-08-14	13.0783	11.8783	14.5517
2014-08-15	18.9233	14.9317	15.72
2014-08-16	17.1292	15.515	16.0167
2014-08-17	15.8342	15.64	15.8075
2014-08-18	17.2933	12.3392	14.3875
2014-08-19	16.0825	13.9275	14.8458
2014-08-20	17.0867	13.6333	15.14
2014-08-21	19.1733	13.4242	14.595
2014-08-22	19.09	10.8342	14.1375
2014-08-23	18.2983	12.5058	13.3425
2014-08-24	17.1283	14.5533	13.5508
2014-08-25	19.9183	16.2233	13.8017
2014-08-26	20.215	15.9725	15.2208
2014-08-27	20.2567	11.5875	14.0108
2014-08-28	18.8375	13.0517	16.3067
2014-08-29	17.7117	14.3892	16.4317
2014-08-30	15.5408	12.9692	15.1792
2014-08-31	16.4592	13.3858	13.885
2014-09-01	18.5883	13.555	16.6425
2014-09-02	19.2133	16.3483	17.1417
2014-09-03	15.2492	15.5125	17.5617
2014-09-04	15.0408	14.175	16.2667
2014-09-05	15.75	12.7192	17.2275
2014-09-06	16.2925	14.1808	17.395
2014-09-07	16.0442	12.1767	16.935
2014-09-08	14.7875	13.97	14.8033
2014-09-09	15.1667	12.59	12.2117
2014-09-10	15.7067	15.4758	14.1767
2014-09-11	16.7508	15.35	16.3883
2014-09-12	16.71	11.2942	16.3467
2014-09-13	15.2908	12.4242	14.76
2014-09-14	10.8683	12.1308	13.09
2014-09-15	11.2425	11.5883	11.5442
2014-09-16	12.8275	12.0908	12.84
2014-09-17	13.4967	10.2917	12.6742
2014-09-18	11.955	7.78083	8.66083
2014-09-19	10.8233	7.73833	11.5025
2014-09-20	9.82083	9.5375	12.295
2014-09-21	10.7817	12.6742	12.0033
2014-09-22	10.7017	11.2517	9.16167
2014-09-23	9.40417	9.24583	7.44583
2014-09-24	9.73667	7.86417	11.1692
2014-09-25	8.945	10.8333	10.8783
2014-09-26	9.23667	11.8367	11.6283
2014-09-27	12.6217	10.1233	11.7525
2014-09-28	11.7467	9.79	9.2875
2014-09-29	11.2883	10.585	9.91417
2014-09-30	11.0783	11.4192	11.3783
2014-10-01	10.9525	12.13	11.5867
2014-10-02	10.0742	12.2975	11.92
2014-10-03	11.3258	11.5458	12.505
2014-10-04	10.4908	11.3375	12.0875
2014-10-05	11.285	11.6725	11.6267
2014-10-06	12.2033	10.585	11.6283
2014-10-07	10.2825	10.835	11.7117
2014-10-08	11.995	9.49667	11.67
2014-10-09	9.73833	7.99167	10.0842
2014-10-10	9.82	8.2425	9.11833
2014-10-11	9.695	7.3625	10.1233
2014-10-12	8.73667	5.31167	11.17
2014-10-13	8.02833	5.605	10.7117
2014-10-14	7.36	2.66917	10.67
2014-10-15	6.26833	5.98	10.67
2014-10-16	7.4425	7.94833	10.67
2014-10-17	8.44417	9.035	10.67
2014-10-18	10.8242	8.24417	10.67
2014-10-19	9.1525	11.1292	10.67
2014-10-20	9.02917	12.55	10.67
2014-10-21	11.4108	12.51	10.67
2014-10-22	10.6142	10.2067	10.67
2014-10-23	9.1125	9.87	10.67
2014-10-24	11.5375	10.205	10.67
2014-10-25	12.4133	10.63	10.67
2014-10-26	12.1633	10.6717	10.67
2014-10-27	11.12	10.7967	10.67
2014-10-28	12.58	10.7108	10.67
2014-10-29	12.955	9.91667	10.67
2014-10-30	12.705	10.6717	10.67
2014-10-31	12.33	10.63	10.67
2014-11-01	12.205	10.63	10.67
2014-11-02	10.9525	9.32917	10.545
2014-11-03	9.0275	8.41167	10.17
2014-11-04	8.15333	7.44583	10.17
2014-11-05	7.52833	6.65167	10.17
2014-11-06	6.64583	6.11	9.745
2014-11-07	5.51833	3.885	9.535
2014-11-08	5.31	3.93	9.16
2014-11-09	4.97667	4.35	9.11833
2014-11-10	4.56	4.18333	8.66
2014-11-11	4.31	4.1	8.16
2014-11-12	4.06	4.475	8.16
2014-11-13	3.685	3.17417	7.91
2014-11-14	4.39333	2.965	7.66
2014-11-15	4.185	3.59	7.99333
2014-11-16	3.56	3.845	7.32083
2014-11-17	3.56	4.0575	6.1075
2014-11-18	3.2625	3.8025	6.15
2014-11-19	3.05	3.59	6.06667
2014-11-20	4.26833	3.59	6.65
2014-11-21	5.10167	3.93	7.15
2014-11-22	5.76833	4.14167	6.775
2014-11-23	6.22667	4.6	6.56667
2014-11-24	5.64333	4.93333	6.65
2014-11-25	5.56	4.8075	6.775
2014-11-26	5.06	3.93083	7.15
2014-11-27	3.8075	4.1	6.94167
2014-11-28	2.05	4.1	6.4825
2014-11-29	2.05	4.015	4.26333
2014-11-30	2.13333	3.50667	5.97917
2014-12-01	2.50833	2.33583	6.44083
2014-12-02	2.05	2.715	6.525
2014-12-03	2.05	3.09	5.97917
2014-12-04	2.05	3.09	5.14
2014-12-05	1.925	3.09	4.80667
2014-12-06	2.00833	3.09	4.43167
2014-12-07	2.05	2.79833	3.97333
2014-12-08	2.05	2.59	4.14
2014-12-09	2.05	2.59	4.14
2014-12-10	2.05	2.59	3.97333
2014-12-11	2.05	2.59	3.64
2014-12-12	2.05	2.59	3.64
2014-12-13	2.05	2.59	3.2575
2014-12-14	2.05	2.59	2.79667
2014-12-15	2.05	2.59	3.13
2014-12-16	2.05	2.59	3.13
2014-12-17	2.05	2.335	3.13
2014-12-18	2.05	2.2075	2.92167
2014-12-19	2.05	2.08	2.63
2014-12-20	2.05	2.08	2.83917
2014-12-21	2.05	2.08	2.67167
2014-12-22	2.05	2.08	2.63
2014-12-23	2.05	2.08	2.46333
2014-12-24	2.05	2.08	2.13
2014-12-25	2.05	2.08	2.13
2014-12-26	2.05	2.08	2.13
2014-12-27	1.88333	2.08	2.045
2014-12-28	1.96667	2.08	1.96
2014-12-29	1.75833	2.08	1.875
2014-12-30	1.55	2.08	1.62
2014-12-31	1.55	2.08	1.245
2015-01-01	1.55	1.91333	1.12
2015-01-02	1.55	1.58	1.12
2015-01-03	1.55	1.58	1.12
2015-01-04	1.55	1.58	1.12
2015-01-05	1.55	1.58	1.12
2015-01-06	1.55	1.53833	1.12
2015-01-07	1.55	1.08	1.12
2015-01-08	1.55	1.08	1.12
2015-01-09	1.55	1.08	1.12
2015-01-10	1.55	1.205	1.12
2015-01-11	1.55	1.58	1.12
2015-01-12	1.55	1.58	1.12
2015-01-13	1.55	1.58	1.12
2015-01-14	2.05	1.49667	1.20333
2015-01-15	2.05	1.53833	1.57833
2015-01-16	2.05	1.12167	1.62
2015-01-17	1.55	1.08	1.62
2015-01-18	1.55	0.6975	1.62
2015-01-19	1.55	0.57	1.62
2015-01-20	1.46667	0.57	1.62
2015-01-21	1.3	0.57	1.62
2015-01-22	1.05	0.57	1.495
2015-01-23	1.05	0.57	1.12
2015-01-24	1.05	0.57	1.12
2015-01-25	1.05	0.57	1.12
2015-01-26	1.05	0.57	1.12
2015-01-27	1.05	0.57	1.12
2015-01-28	1.05	0.57	1.12
2015-01-29	1.05	0.57	1.12
2015-01-30	1.05	0.57	0.87
2015-01-31	0.966667	0.57	1.08083
2015-02-01	1.05	0.57	0.37
2015-02-02	1.05	0.57	0.12
2015-02-03	1.05	0.57	0.12
2015-02-04	1.05	0.57	0.12
2015-02-05	1.05	0.57	0.12
2015-02-06	1.05	0.57	0.12
2015-02-07	1.05	0.57	0.12
2015-02-08	1.05	0.57	0.12
2015-02-09	1.05	0.57	0.12
2015-02-10	1.05	0.57	0.12
2015-02-11	1.05	0.57	0.286667
2015-02-12	1.05	0.57	0.12
2015-02-13	1.05	0.57	0.12
2015-02-14	1.05	0.57	0.12
2015-02-15	1.05	0.57	0.453333
2015-02-16	1.05	0.57	0.62
2015-02-17	1.05	0.57	0.62
2015-02-18	1.05	0.57	0.62
2015-02-19	1.05	0.57	0.62
2015-02-20	1.05	0.57	0.62
2015-02-21	1.05	0.57	0.245
2015-02-22	1.05	0.57	0.328333
2015-02-23	1.05	0.655	0.411667
2015-02-24	1.05	0.7825	0.62
2015-02-25	1.05	0.8675	0.62
2015-02-26	1.05	1.0375	0.62
2015-02-27	1.05	1.08	0.62
2015-02-28	1.05	1.08	0.62
2015-03-01	1.05	1.08	0.62
2015-03-02	1.05	1.08	0.62
2015-03-03	1.05	1.08	0.286667
2015-03-04	1.05	1.08	0.12
2015-03-05	1.05	1.08	0.12
2015-03-06	1.05	1.08	0.12
2015-03-07	1.05	1.08	0.12
2015-03-08	1.05	1.08	0.12
2015-03-09	1.05	1.08	0.12
2015-03-10	1.05	1.08	0.12
2015-03-11	1.05	1.08	0.12
2015-03-12	1.05	1.08	0.12
2015-03-13	1.05	1.08	0.12
2015-03-14	1.05	1.08	0.12
2015-03-15	1.05	1.08	0.12
2015-03-16	1.05	1.08	0.12
2015-03-17	1.05	1.08	0.12
2015-03-18	1.05	1.08	0.12
2015-03-19	1.05	1.08	0.12
2015-03-20	1.05	1.08	0.203333
2015-03-21	1.05	1.08	0.286667
2015-03-22	1.05	1.08	0.286667
2015-03-23	1.05	1.08	0.495
2015-03-24	1.05	1.08	0.62
2015-03-25	1.05	1.08	0.536667
2015-03-26	1.05	1.08	0.453333
2015-03-27	1.05	1.08	0.12
2015-03-28	1.05	1.08	0.12
2015-03-29	1.05	1.08	0.12
2015-03-30	1.05	0.995	0.12
2015-03-31	1.05	0.57	0.12
2015-04-01	1.05	0.57	0.12
2015-04-02	1.05	0.57	0.12
2015-04-03	1.05	0.57	0.12
2015-04-04	1.05	0.57	0.12
2015-04-05	0.925	0.57	0.12
2015-04-06	0.55	0.57	0.12
2015-04-07	0.55	0.57	0.203333
2015-04-08	0.55	0.57	0.578333
2015-04-09	0.55	0.57	0.62
2015-04-10	0.55	0.57	0.703333
2015-04-11	0.55	0.57	1.33083
2015-04-12	0.55	0.57	2.79667
2015-04-13	0.55	0.57	3.7625
2015-04-14	0.55	0.57	3.63583
2015-04-15	0.55	0.57	3.76083
2015-04-16	0.55	0.74	4.13917
2015-04-17	0.55	0.655	6.27167
2015-04-18	0.55	1.0375	5.81167
2015-04-19	0.55	1.08	4.17917
2015-04-20	0.55	1.08	5.26833
2015-04-21	0.55	1.205	5.56167
2015-04-22	0.55	1.62167	5.89583
2015-04-23	0.55	2.87667	8.5725
2015-04-24	0.55	6.44167	7.23667
2015-04-25	0.55	5.47833	7.02667
2015-04-26	0.55	3.21333	4.47417
2015-04-27	0.55	1.16333	1.96
2015-04-28	0.55	1.54	4.68083
2015-04-29	0.55	4.095	7.78
2015-04-30	0.55	5.51917	8.99167
2015-05-01	0.55	5.81417	8.035
2015-05-02	0.55	9.49583	9.70667
2015-05-03	0.55	7.78167	9.83083
2015-05-04	0.55	7.02667	9.53583
2015-05-05	0.55	7.40167	9.53833
2015-05-06	0.55	7.73917	9.78917
2015-05-07	0.8	10.4575	10.9592
2015-05-08	3.1375	8.99417	11.5033
2015-05-09	10.4483	10.625	12.4242
2015-05-10	13.705	12.3817	14.4708
2015-05-11	13.2875	12.9258	12.9233
2015-05-12	12.785	9.705	13.68
2015-05-13	15.6217	15.5567	14.555
2015-05-14	19.5017	19.77	13.93
2015-05-15	23.2975	23.3158	11.67
2015-05-16	23.6733	23.8167	11.2117
2015-05-17	24.1733	24.2333	13.8433
2015-05-18	25.1525	25.15	15.93
2015-05-19			13.0092
2015-05-20			8.9525
2015-05-21			9.41083
2015-05-22			10.5
2015-05-23			11.42
2015-05-24			12.5058
2015-05-25			12.8833
2015-05-26			13.385
2015-05-27			16.0567
2015-05-28			15.14
2015-05-29			14.93
2015-05-30			15.6833
2015-05-31			16.8492
2015-06-01			15.8075
